# Supplementary material for: Involvement of the YneS/YgiH and PlsX proteins in phospholipid biosynthesis in both Bacillus subtilis and Escherichia coli
Source: PubMed Central journal article supplement (PMC1950310; doi:10.1186/1471-2180-7-69), 2007-07-24
Supplement: 1471-2180-7-69-S1.pdf [file 1471-2180-7-69-S1.pdf]

**Table S1 *B. subtilis* strains used in this study and their genotypes**

| Strain | Genotype                                                                                            | Construction               | Reference or source |
|--------|-----------------------------------------------------------------------------------------------------|----------------------------|---------------------|
| 168    | <i>trpC2</i>                                                                                        |                            | Laboratory stock    |
| YNESp  | <i>trpC2</i> $\Delta$ <i>yneS</i> ::pMutinNC ( <i>P</i> spac- <i>yneS erm</i> )                     |                            | (1)                 |
| MY101  | <i>trpC2 yneR</i> :: <i>cat</i> <sup>+</sup>                                                        |                            | This study          |
| MY102  | <i>trpC2</i> $\Delta$ <i>yneR</i> :: <i>cat</i> <sup>-</sup>                                        | pCH11 → MY101              | This study          |
| MY103  | <i>trpC2 yneS-ts cat</i>                                                                            |                            | This study          |
| MY105  | <i>trpC2 yneS-ts cat sup-1</i>                                                                      |                            | This study          |
| MY107  | <i>trpC2</i> $\Delta$ <i>yneS</i> ::pMutinNC ( <i>P</i> spac- <i>yneS erm</i> ) <i>sup-1</i>        | YNESp → MY105              | This study          |
| MY108  | <i>trpC2</i> $\Delta$ <i>glpD</i> ::pMutinNC ( <i>erm</i> )                                         | pMutinNC <i>glpD</i> → 168 | This study          |
| MY109  | <i>trpC2 yneS-ts cat</i> $\Delta$ <i>glpD</i> ::pMutinNC ( <i>erm</i> )                             | MY108 → MY103              | This study          |
| MY110  | <i>trpC2</i> $\Delta$ <i>aprE</i> ::Pspac- <i>plsX-kan</i>                                          | pAPNCK <i>plsX</i> → 168   | This study          |
| MY111  | <i>trpC2</i> $\Delta$ <i>aprE</i> ::Pspac- <i>plsX-kan</i> $\Delta$ <i>plsX</i> :: <i>cat-p-t</i> * |                            | This study          |
| MY112  | <i>trpC2 plsC-C<math>\Delta</math>7 cat</i>                                                         |                            | This study          |

\* coding sequence of the chloramphenicol-resistant gene without the promoter and terminator

### Reference

1. Kobayashi K, Ehrlich SD, Albertini A, Amati G, Andersen KK, Arnaud M, Asai K, Ashikaga S, Aymerich S, Bessieres P *et al*: **Essential *Bacillus subtilis* genes**. *Proc Natl Acad Sci U S A* 2003, **100**(8):4678-4683.
