# Supplementary material for: Involvement of the YneS/YgiH and PlsX proteins in phospholipid biosynthesis in both Bacillus subtilis and Escherichia coli
Source: PubMed Central journal article supplement (PMC1950310; doi:10.1186/1471-2180-7-69), 2007-07-24
Supplement: 1471-2180-7-69-S3.pdf [file 1471-2180-7-69-S3.pdf]

**Table S3 Plasmids used in this study**

| Plasmid                                                                         | Characteristic                                                                                                                                 | Primers for construction                          | Reference or Source |
|---------------------------------------------------------------------------------|------------------------------------------------------------------------------------------------------------------------------------------------|---------------------------------------------------|---------------------|
| <b>Plasmids used for the <i>B. subtilis</i> transformation</b>                  |                                                                                                                                                |                                                   |                     |
| pCH11                                                                           | pUB110 <i>ori-ts</i> pBR322 <i>ori cat</i> (harboring nonsense mutation) (Km <sup>r</sup> Amp <sup>r</sup> )                                   |                                                   | (1)                 |
| pCA191                                                                          | pUC19 derivative harboring <i>cat</i> (Cm <sup>r</sup> Amp <sup>r</sup> )                                                                      |                                                   | (2)                 |
| pCA191 <i>glpD</i> -FL                                                          | pCA191 derivative harboring full length of <i>glpD</i> (-288 to 1668) (Cm <sup>r</sup> )                                                       | <i>glpD</i> -N-F, <i>glpD</i> -C-R                | This study          |
| pCA191 <i>glpD</i> -N                                                           | pCA191 derivative harboring N-terminal fragment of <i>glpD</i> (-288 to 942) (Cm <sup>r</sup> )                                                | <i>glpD</i> -N-F, <i>glpD</i> -N-R                | This study          |
| pCA191 <i>glpD</i> -C                                                           | pCA191 derivative harboring C-terminal fragment of <i>glpD</i> (820 to 1668) (Cm <sup>r</sup> )                                                | <i>glpD</i> -C-F, <i>glpD</i> -C-R                | This study          |
| pMutinNC                                                                        | Plasmid vector to construct knockout or conditional-null mutants of the <i>B. subtilis</i> genes (Em <sup>r</sup> Amp <sup>r</sup> )           |                                                   | (3)                 |
| pMutinNC <i>glpD</i>                                                            | pMutNC derivative harboring internal fragment of <i>glpD</i> (23 to 182) (Em <sup>r</sup> )                                                    | pMut- <i>glpD</i> -F, pMut- <i>glpD</i> -R        | This study          |
| pAPNC213                                                                        | Plasmid vector to integrate a target gene fused with <i>Pspac</i> into the <i>B. subtilis aprE</i> locus (Spec <sup>r</sup> Amp <sup>r</sup> ) |                                                   | (3)                 |
| pDG780                                                                          | pBluescript KS <sup>+</sup> harboring <i>kan</i> (Amp <sup>r</sup> Km <sup>r</sup> )                                                           |                                                   | (4)                 |
| pAPNCK                                                                          | pANNC213 derivative harboring <i>kan</i> (Km <sup>r</sup> Amp <sup>r</sup> )                                                                   |                                                   | This study          |
| pAPNCK <i>plsX</i>                                                              | pAPNCK derivative harboring <i>plsX</i> (-22 to 1011) (Km <sup>r</sup> )                                                                       | pAP- <i>plsX</i> -F, pAP- <i>plsX</i> -R          | This study          |
| <b>Plasmids used for protein expression in <i>E. coli</i></b>                   |                                                                                                                                                |                                                   |                     |
| pSTV28                                                                          | pACYC184 derived cloning vector (Cm <sup>r</sup> )                                                                                             |                                                   | Takara              |
| pSTV29                                                                          | pACYC184 derived cloning vector (Cm <sup>r</sup> )                                                                                             |                                                   | Takara              |
| pSTV29 <i>plsB</i>                                                              | pSTV29 derivative harboring <i>plsB</i> (-229 to 2428) (Cm <sup>r</sup> )                                                                      | PLSB-F, PLSB-R                                    | This study          |
| pSTV28 <i>EcplsX</i>                                                            | pSTV29 derivative harboring <i>E.coli plsX</i> (-81 to 1045) (Cm <sup>r</sup> )                                                                | ECPLSX-F, ECPLSX-R                                | This study          |
| pSTV29 <i>ygiH</i>                                                              | pSTV29 derivative harboring <i>ygiH</i> (-177 to 625) (Cm <sup>r</sup> )                                                                       | YGIH-F, YGIH-R                                    | This study          |
| pSTV28 <i>BsplsX</i>                                                            | pSTV29 derivative harboring <i>B.subtilis plsX</i> (-22 to 1011) (Cm <sup>r</sup> )                                                            | BSPLSX-F, BSPLSX-R                                | This study          |
| pSTV29 <i>yneS</i>                                                              | pSTV29 derivative harboring <i>yneS</i> (-129 to 584) (Cm <sup>r</sup> )                                                                       | YNES-F, YNES-R                                    | This study          |
| pSTV28 <i>plsB-p</i>                                                            | pSTV28 derivative harboring <i>plsB</i> (-90 to 2424) (Cm <sup>r</sup> )                                                                       | PLSB-p-F, PLSB-p-R                                | This study          |
| pMW118                                                                          | pSC101 derived cloning vector (Amp <sup>r</sup> )                                                                                              |                                                   | Nippon Gene         |
| pMW118 <i>ygiH</i>                                                              | pMW118 derivative harboring <i>ygiH</i> (-177 to 625) (Amp <sup>r</sup> )                                                                      |                                                   | This study          |
| pMW118 <i>yneS</i>                                                              | pMW118 derivative harboring <i>yneS</i> (-129 to 584) (Amp <sup>r</sup> )                                                                      |                                                   | This study          |
| pSTV29 <i>plsB26</i>                                                            | pSTV29 derivative harboring <i>plsB26</i> (-169 to 2488) (Cm <sup>r</sup> )                                                                    | PLSB-F, PLSB-R                                    | This study          |
| pUC18                                                                           | pMB1 derived cloning vector (Amp <sup>r</sup> )                                                                                                |                                                   | Takara              |
| pUC18S                                                                          | pUC18 derivative harboring <i>spec</i> (Spec <sup>r</sup> )                                                                                    | Spec-F-AatII, Spec-R-Eam1105I                     | This study          |
| pUC18 <i>StesA</i>                                                              | pUC18S derivative harboring <i>tesA</i> (-82 to 638) (Spec <sup>r</sup> )                                                                      | TesA-FEcoRI, TesA-RBamHI                          | This study          |
| <b>Plasmids used for construction of IAA-inducible strain in <i>E. coli</i></b> |                                                                                                                                                |                                                   |                     |
| pMC1403                                                                         | pBR322 derived <i>lacZ</i> fusion vector (Amp <sup>r</sup> )                                                                                   |                                                   | (5)                 |
| pMC1403Pw                                                                       | pMC1403 derivative harboring the <i>trp</i> promoter region ( <i>trpL</i> -105 to 120) (Amp <sup>r</sup> )                                     | P <sub>trp</sub> -FMunI, P <sub>trp</sub> -REcoRI | This study          |
| pMC1403Pw- <i>plsB</i>                                                          | pMC1403Pw derivative harboring <i>plsB</i> (-20 to 2424) (Amp <sup>r</sup> )                                                                   | PLSB-F2, PLSB-R2                                  | This study          |
| pMC1403Pw- <i>EcplsX</i>                                                        | pMC1403Pw derivative harboring <i>E.coli plsX</i> (-81 to 1045) (Amp <sup>r</sup> )                                                            | ECPLSX-F2, EC-PLSX-R2                             | This study          |
| pMC1403Pw- <i>ygiH</i>                                                          | pMC1403Pw derivative harboring <i>ygiH</i> (-16 to 625) (Amp <sup>r</sup> )                                                                    | YGIH-F2, YGIH-R2                                  | This study          |

**References**

1. Kawamura, F., personal communication
2. Murakami T, Haga K, Takeuchi M, Sato T: **Analysis of the *Bacillus subtilis spoIIIJ* gene and its Paralogue gene, *yqjG*.** *J Bacteriol* 2002, **184**(7):1998-2004.
3. Morimoto T, Loh PC, Hirai T, Asai K, Kobayashi K, Moriya S, Ogasawara N: **Six GTP-binding proteins of the Era/Obg family are essential for cell growth in *Bacillus subtilis*.** *Microbiology* 2002, **148**(Pt 11):3539-3552.
4. Guerout-Fleury AM, Shazand K, Frandsen N, Stragier P: **Antibiotic-resistance cassettes for *Bacillus subtilis*.** *Gene* 1995, **167**(1-2):335-336.
5. Casadaban MJ, Chou J, Cohen SN: **In vitro gene fusions that join an enzymatically active  $\beta$ -galactosidase segment to amino-terminal fragments of exogenous proteins: *Escherichia coli* plasmid vectors for the detection and cloning of translational initiation signals.** *J Bacteriol* 1980, **143**(2):971-980.
